# Supplementary material for: Co-culture of induced pluripotent stem cells with cardiomyocytes is sufficient to promote their differentiation into cardiomyocytes
Source: PubMed Central journal article supplement (PMC7122760; doi:10.1371/journal.pone.0230966), 2020-04-03
Supplement: pone.0230966.s001.pdf [file pone.0230966.s001.pdf]

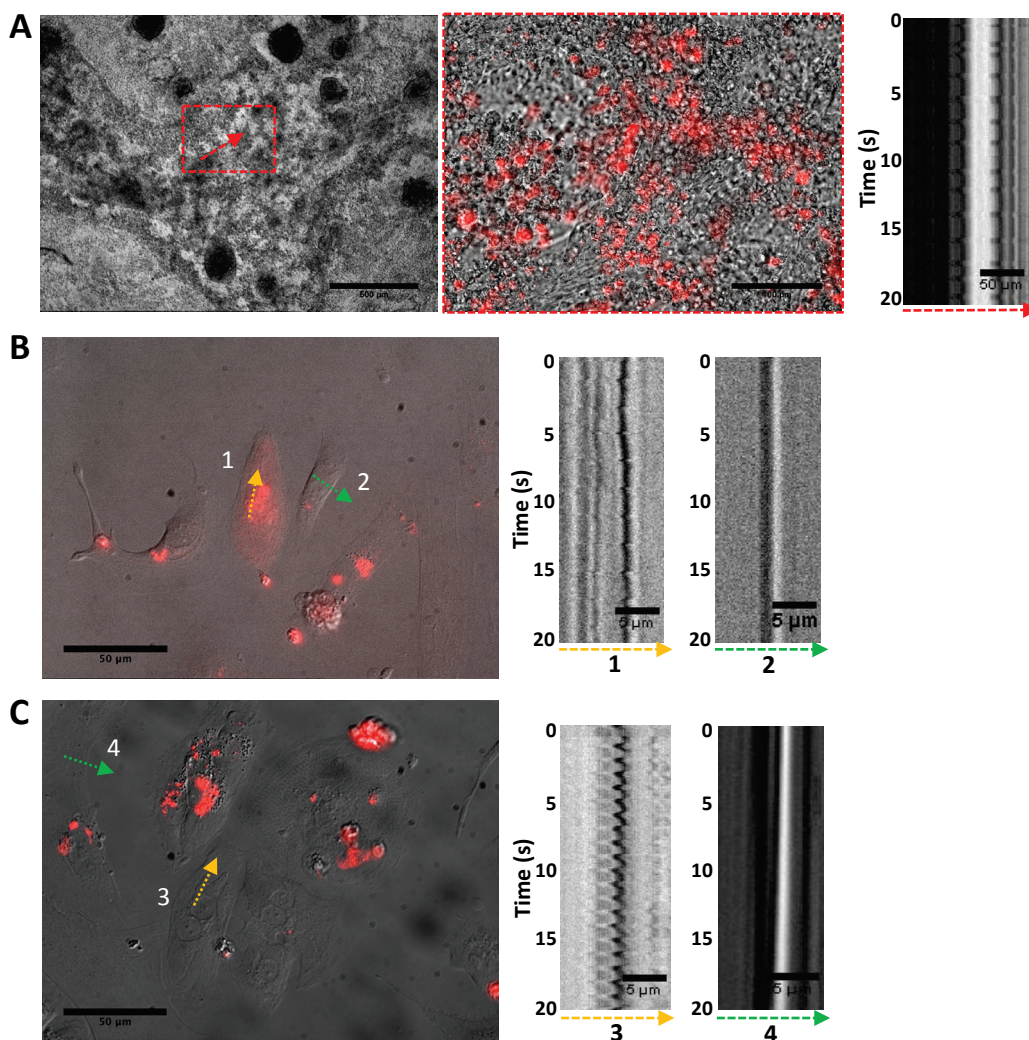

**S1 Fig. Fluorescent images and kymographs of co-culture differentiation of CellTracker™-labeled iPS cells via pre-culture method.**

(A) DIC image of pre-culture on day 8 (scale bar: 500µm), red box shows magnified overlay of DIC and TRITC images (scale bar: 100µm). Kymograph of contracting cluster indicated by red arrow line scan (scale bar: 50µm). (B,C) Overlay image of pre-culture at low density and kymographs showing fluorescently labeled cell exhibiting spontaneous self contraction (1) and non-contraction (2). Non-labeled cells can also be observed to exhibit spontaneous self contraction (3) and non-contraction (4). Scale bars: 50µm in overlay, 5µm in kymographs.
