# Supplementary material for: Co-culture of induced pluripotent stem cells with cardiomyocytes is sufficient to promote their differentiation into cardiomyocytes
Source: PubMed Central journal article supplement (PMC7122760; doi:10.1371/journal.pone.0230966), 2020-04-03
Supplement: pone.0230966.s003.pdf [file pone.0230966.s003.pdf]

**A: AICS16 GiWi**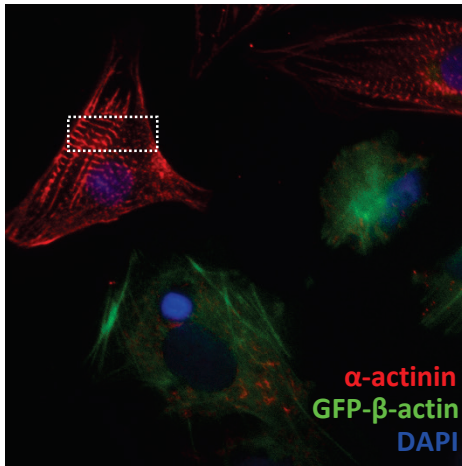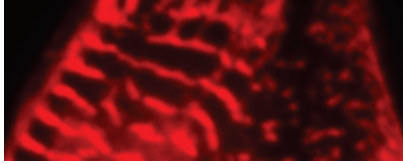**B: AICS16 + IMR90 med $\Delta$** 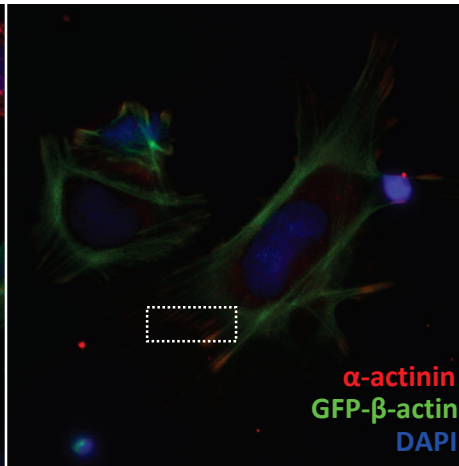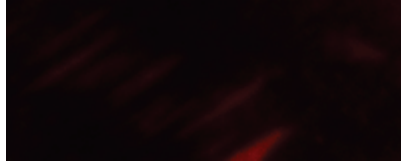**C: AICS16 med $\Delta$** 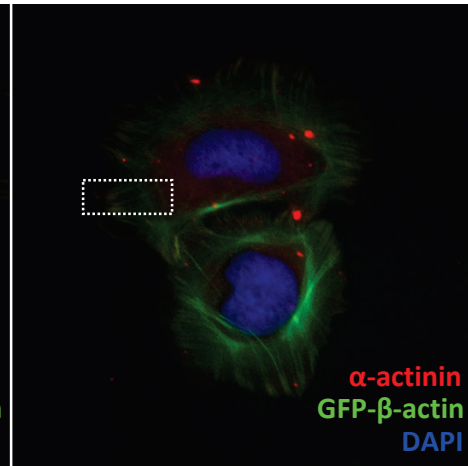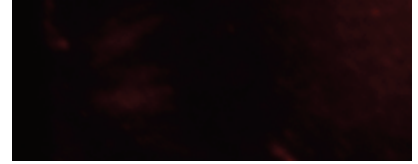**D: AICS11 GiWi**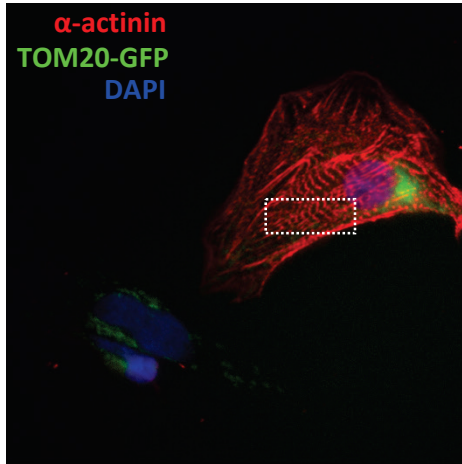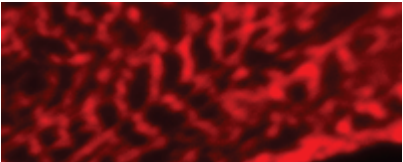**E: AICS11 + IMR90 med $\Delta$** 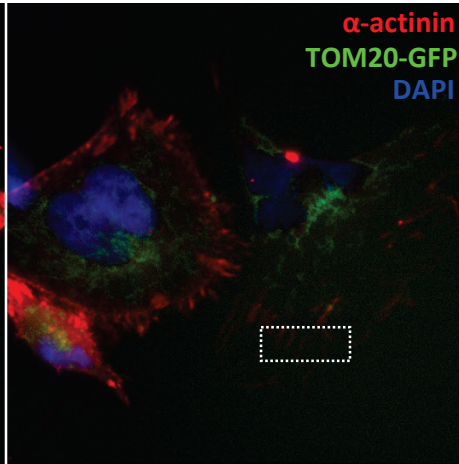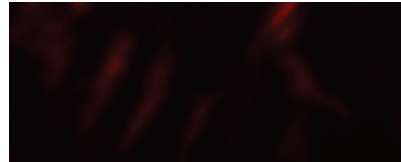**F: AICS11 med $\Delta$** 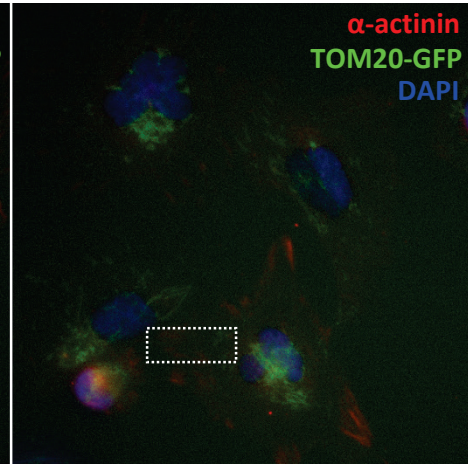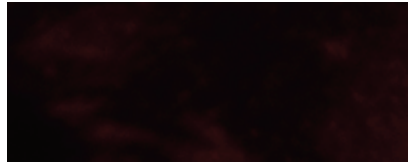

**S3 Fig. Staining of AICS16 (GFP- $\beta$ -actin) and AICS11 (TOM20-GFP) cells for sarcomeric  $\alpha$ -actinin.** AICS16 or AICS11 cells were differentiated using (A,D) GiWi protocol, or (B,E) co-cultured with IMR90 iPS cells, and (C,F) basal media change alone (absent differentiation factors). Bottom panels show a magnified image of  $\alpha$ -actinin staining for the area bounded by white rectangles.
