# Supplementary material for: Co-culture of induced pluripotent stem cells with cardiomyocytes is sufficient to promote their differentiation into cardiomyocytes
Source: PubMed Central journal article supplement (PMC7122760; doi:10.1371/journal.pone.0230966), 2020-04-03
Supplement: pone.0230966.s004.pdf [file pone.0230966.s004.pdf]

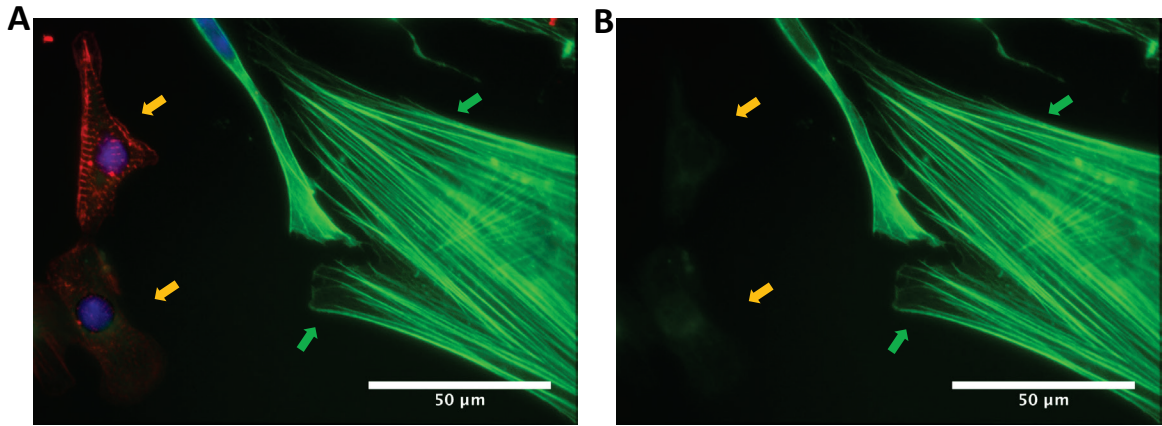

**S4 Fig. GiWi-differentiated AICS16 cells exhibit diminished GFP- $\beta$ -actin expression.** (A) Overlay image showing  $\alpha$ -actinin (red), GFP (green), and DAPI-stained cell nuclei (blue). (B) Fluorescent image showing only GFP (green). Cells staining for sarcomeric  $\alpha$ -actinin (yellow arrows) exhibit reduced GFP fluorescence compared to neighbouring cells (green arrows).
